# Supplementary material for: Population-based Characterization of PTEN Hamartoma Tumor Syndrome
Source: Research Square preprint supplement (doi:10.21203/rs.3.rs-8279719/v1), 2026-01-29

**Supplementary Material**

**Population-Based Characterization of PTEN Hamartoma Tumor Syndrome**

Gideon Idumah, Chloe Bautista, Lin Li, Lamis Yehia, Ying Ni

**Supplementary Table 1:** Comparison of Demographic and Cancer-Related Characteristics by Pathogenic Significance

| **Variable** | **Carriers of P/LP *PTEN* Variant**    N = 551 | **Carriers of *PTEN* Variant of Uncertain Significance**    N = 3422 | **p-value**3 |
| --- | --- | --- | --- |
| **Sex** |  |  | >0.9 |
| Female | 31 (59.6%) | 205 (60.5%) |  |
| Male | 21 (40.4%) | 134 (39.5%) |  |
| **Race** |  |  | <0.001 |
| American Indian or Alaska Native | 0 (0%) | 9 (2.6%) |  |
| Asian | * | 8 (2.3%) |  |
| Black or African American | * | 84 (24.6%) |  |
| Middle Eastern or North African | 0 (0%) | 2 (0.6%) |  |
| More than one population | * | 11 (3.2%) |  |
| Native Hawaiian or Other Pacific Islander | 0 (0%) | 0 (0%) |  |
| Other/Unspecified | * | 61 (17.8%) |  |
| White | 36 (65%) | 167 (48.8%) |  |
| **Cancer Diagnosis** |  |  | <0.001 |
| No | 24 (52.2%) | 189 (80.1%) |  |
| Yes | 22 (47.8%) | 47 (19.9%) |  |
| **Age at First Cancer Diagnosis** | 48 (8 – 67) | 61 (23 – 85) | <0.001 |
| 1Counts of 20 or fewer are suppressed as '*' in compliance with AOU guidelines  2n (%); Median (Min – Max)  3p-values calculated using Kruskal-Wallis test for age and Chi-Squared test for others. | | | |

**
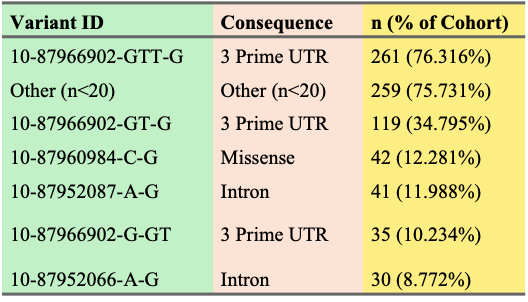
**

**List of *PTEN* Variants of Unspecified Significance**

**Supplementary Figure 1:** Characterization of Participants with *PTEN* Variants of Uncertain Significance (VUS)

1. **Age at First Cancer Diagnosis by Variant Group**


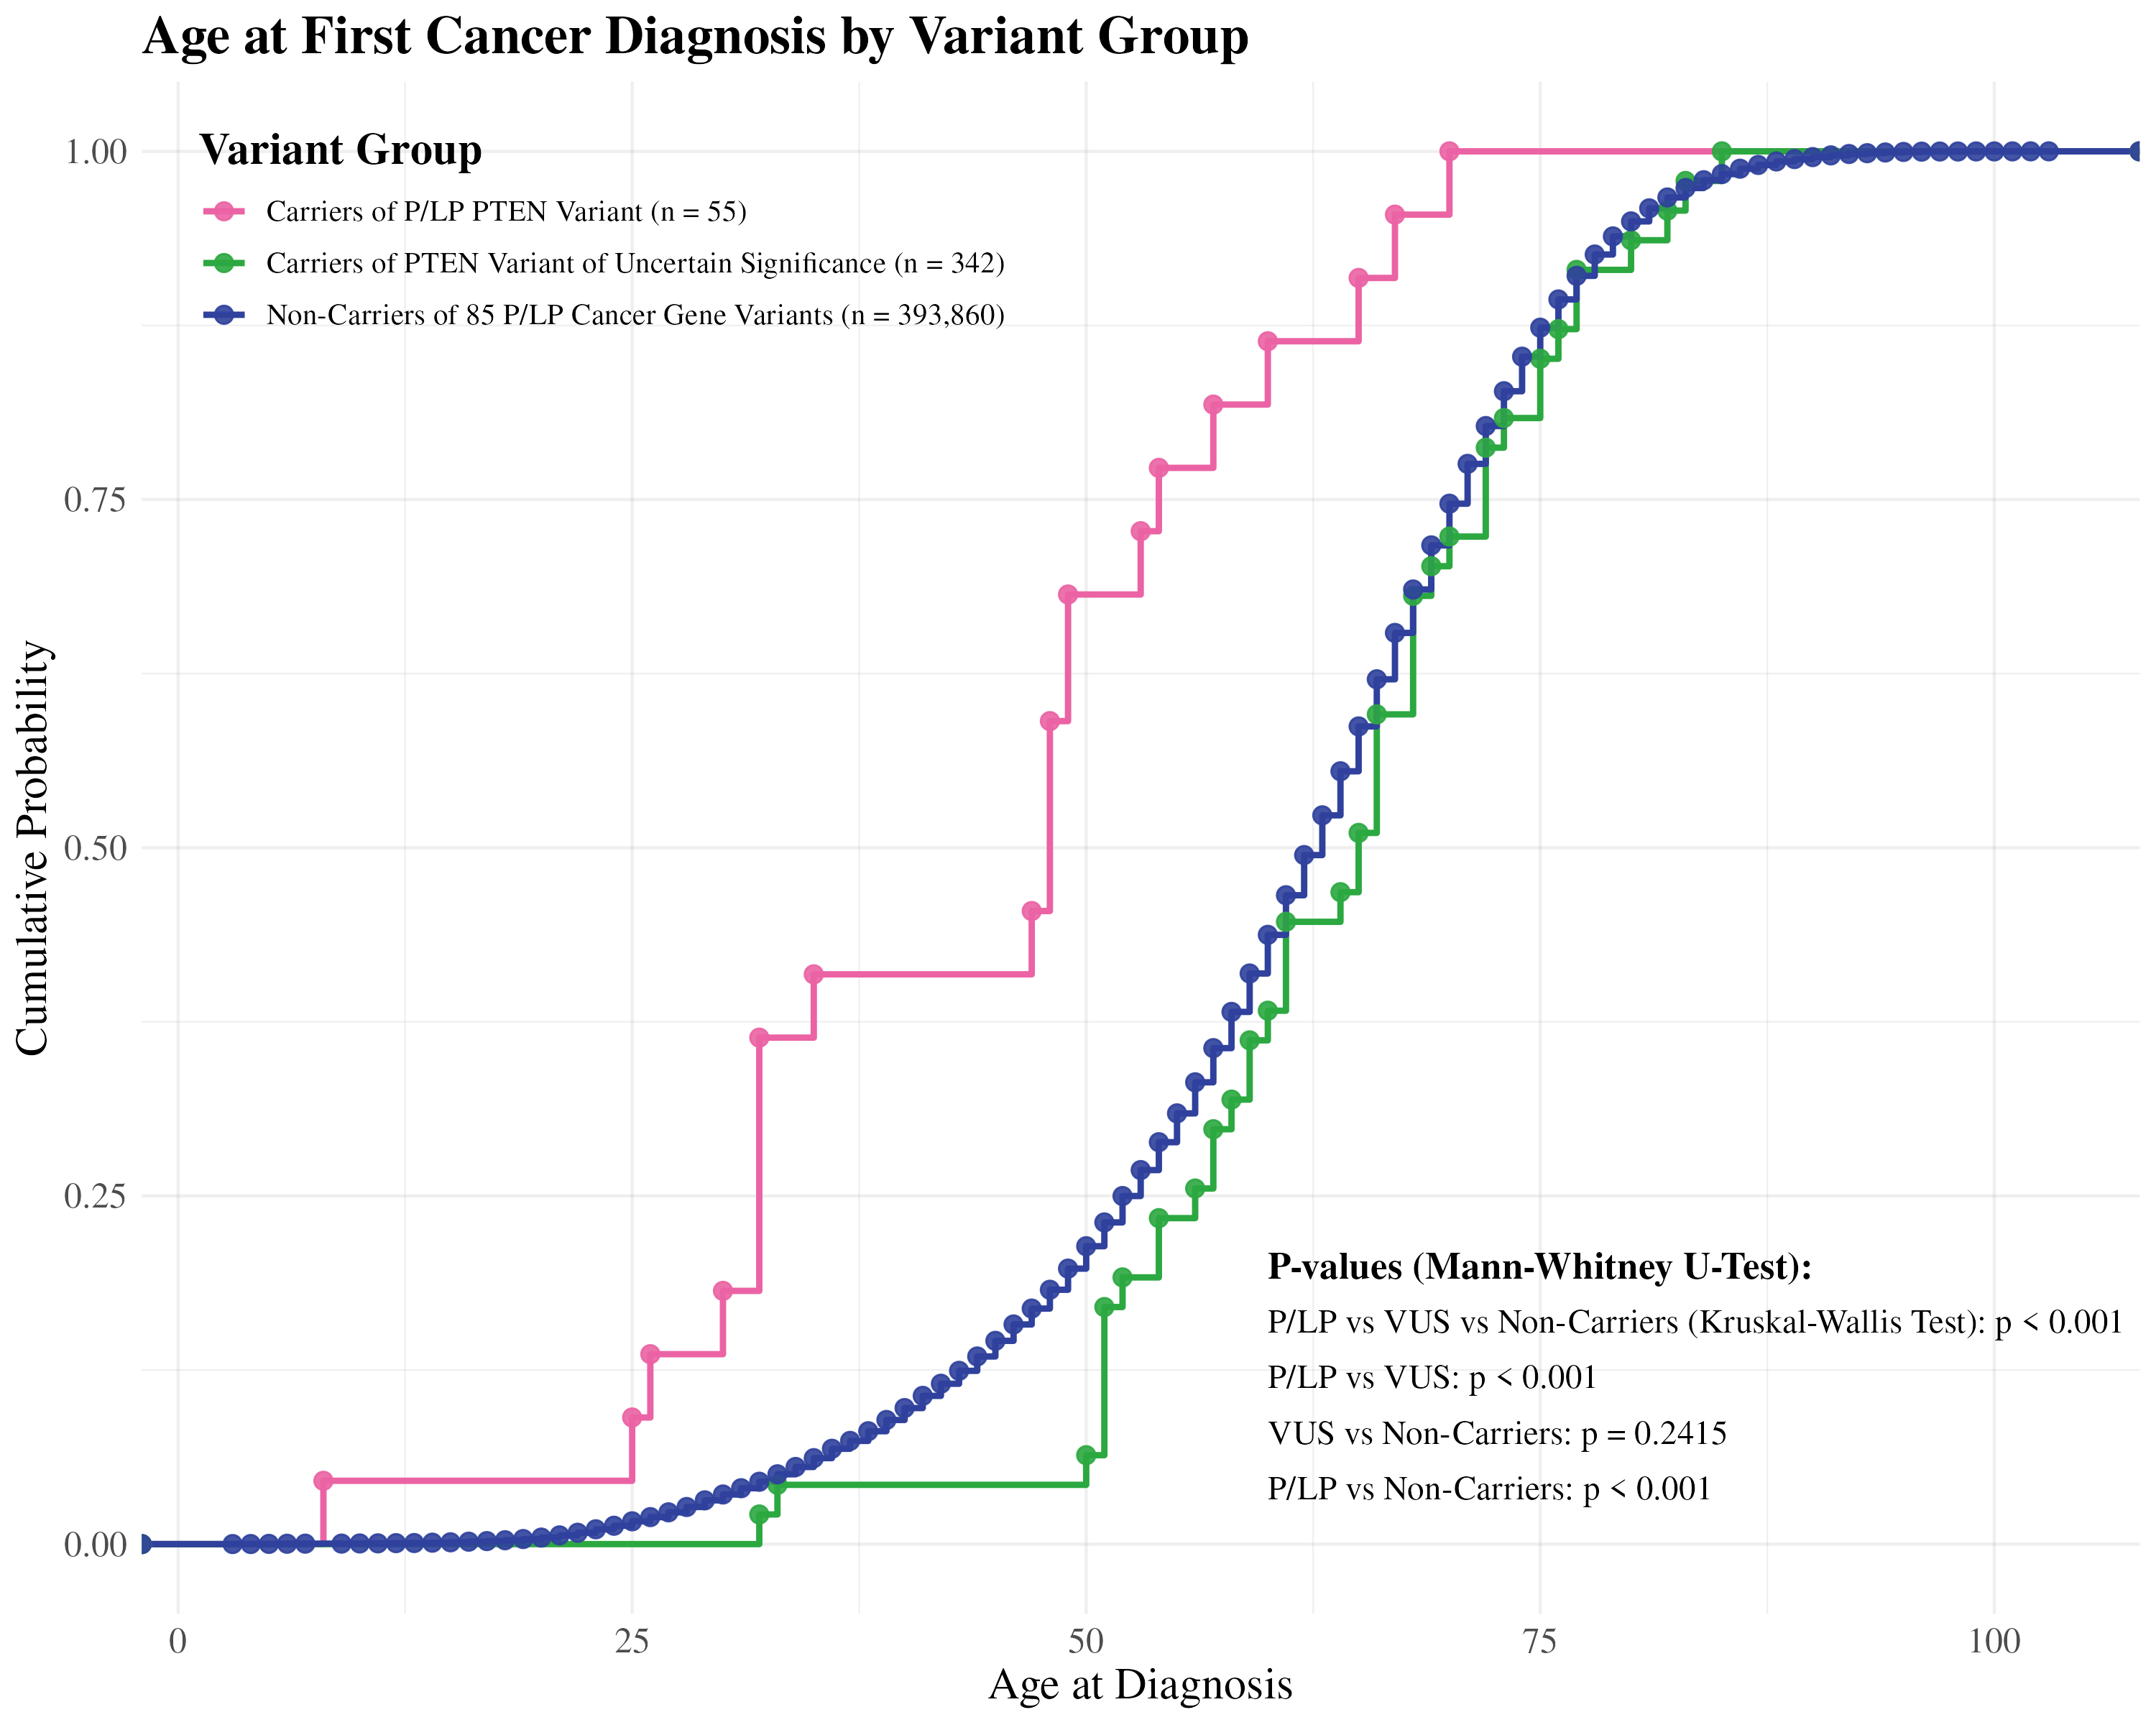


**B. Phenotypic Data of Carriers of *PTEN* VUS**


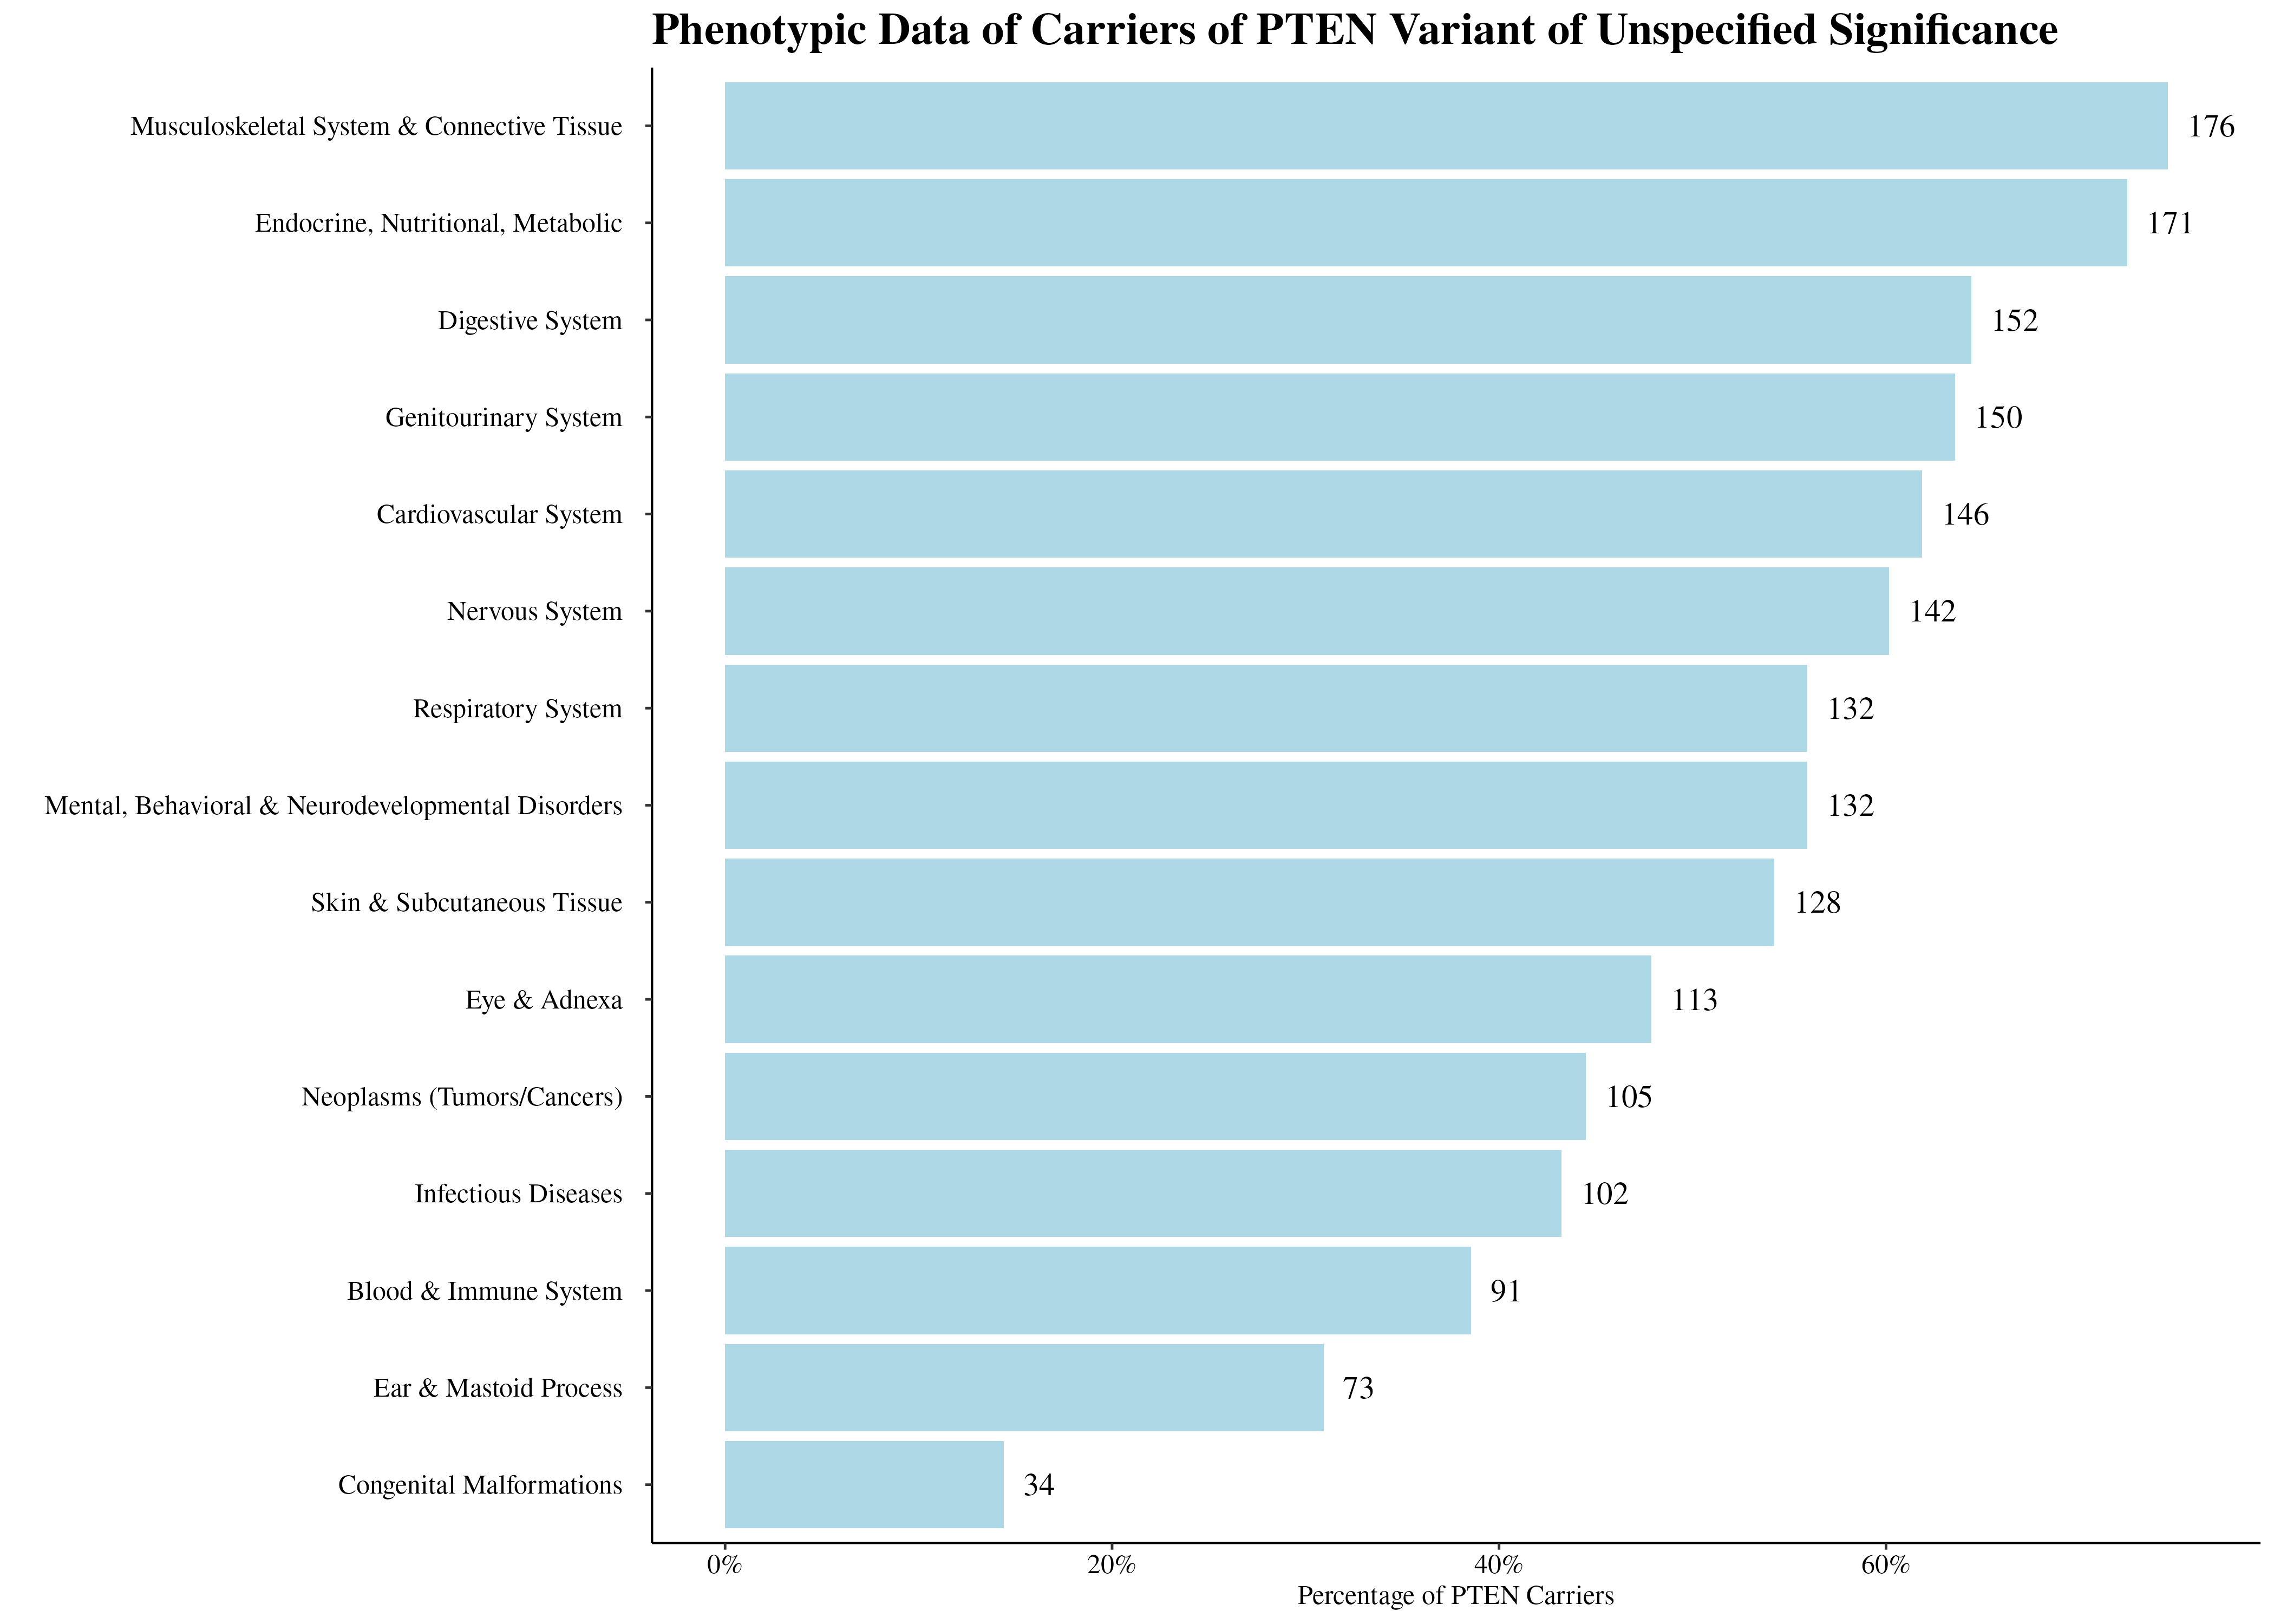

Supplement: Supplementary file 1 [file 500dc82e06b15ca1e68605e4.docx]
