# Supplementary material for: Population-based Characterization of PTEN Hamartoma Tumor Syndrome
Source: Research Square preprint supplement (doi:10.21203/rs.3.rs-8279719/v1), 2026-01-29
Supplement: Supplementary file 2 [file 6e26fbbe6e190c0cf5009765.xlsx]

## Sheet: AOU_PTEN.hg38_multianno
Chr	Start	End	Ref	Alt	Func.refGene	Gene.refGene	GeneDetail.refGene	ExonicFunc.refGene	AAChange.refGene	avsnp151	SIFT_score	SIFT_converted_rankscore	SIFT_pred	SIFT4G_score	SIFT4G_converted_rankscore	SIFT4G_pred	Polyphen2_HDIV_score	Polyphen2_HDIV_rankscore	Polyphen2_HDIV_pred	Polyphen2_HVAR_score	Polyphen2_HVAR_rankscore	Polyphen2_HVAR_pred	LRT_score	LRT_converted_rankscore	LRT_pred	LRT_Omega	MutationTaster_score	MutationTaster_converted_rankscore	MutationTaster_pred	MutationAssessor_score	MutationAssessor_rankscore	MutationAssessor_pred	FATHMM_score	FATHMM_converted_rankscore	FATHMM_pred	PROVEAN_score	PROVEAN_converted_rankscore	PROVEAN_pred	VEST4_score	VEST4_rankscore	MetaSVM_score	MetaSVM_rankscore	MetaSVM_pred	MetaLR_score	MetaLR_rankscore	MetaLR_pred	Reliability_index	MetaRNN_score	MetaRNN_rankscore
chr10	87864506	87864506	A	T	exonic	PTEN	.	stopgain	PTEN:NM_000314:exon1:c.A37T:p.K13X,PTEN:NM_001304717:exon2:c.A556T:p.K186X	.	.	.	.	.	.	.	.	.	.	.	.	.	1e-06	0.62929	D	0.055891	1	0.81001	A	.	.	.	.	.	.	.	.	.	0.825	0.82057	.	.	.	.	.	.	.	.	.
chr10	87864514	87864514	A	T	exonic	PTEN	.	nonsynonymous SNV	PTEN:NM_000314:exon1:c.A45T:p.R15S,PTEN:NM_001304717:exon2:c.A564T:p.R188S	rs1064794096	0	0.91255	D	0	0.92824	D	0.141	0.27581	B	0.123	0.32463	B	7e-06	0.62929	D	0.105614	1	0.81001	D	3.79	0.95329	H	-3.86	0.95891	D	-4.85	0.81107	D	0.95	0.95841	0.785	0.94229	D	0.876	0.95891	D	9	0.909529	0.90317
chr10	87894048	87894048	A	G	exonic	PTEN	.	nonsynonymous SNV	PTEN:NM_000314:exon2:c.A103G:p.M35V,PTEN:NM_001304717:exon3:c.A622G:p.M208V	rs876659443	0.002	0.72154	D	0	0.92824	D	0.969	0.56768	D	0.914	0.64984	D	0	0.8433	D	0	1	0.81001	D	2.26	0.64354	M	-5.03	0.98578	D	-3.88	0.7271	D	0.95	0.95841	1.086	0.99075	D	0.959	0.98673	D	9	0.99088	0.99601
chr10	87894049	87894049	T	G	exonic	PTEN	.	nonsynonymous SNV	PTEN:NM_000314:exon2:c.T104G:p.M35R,PTEN:NM_001304717:exon3:c.T623G:p.M208R	rs121909225	0.001	0.7849	D	0	0.92824	D	0.996	0.68779	D	0.974	0.73157	D	0	0.8433	D	0	1	0.81001	A	3.825	0.95591	H	-5.06	0.98629	D	-5.84	0.88431	D	0.991	0.99776	1.065	0.98463	D	0.978	0.99316	D	8	0.995188	0.99976
chr10	87925550	87925550	T	C	exonic	PTEN	.	nonsynonymous SNV	PTEN:NM_000314:exon3:c.T202C:p.Y68H,PTEN:NM_001304717:exon4:c.T721C:p.Y241H	rs398123317	0.018	0.50676	D	0	0.92824	D	1	0.90584	D	0.999	0.92359	D	0	0.8433	D	0	1	0.81001	D	3.37	0.91327	M	-5.04	0.98594	D	-4.81	0.80767	D	0.981	0.991	1.062	0.98388	D	0.979	0.99346	D	9	0.99086	0.99599
chr10	87925550	87925550	T	C	exonic	PTEN	.	nonsynonymous SNV	PTEN:NM_000314:exon3:c.T202C:p.Y68H,PTEN:NM_001304717:exon4:c.T721C:p.Y241H	rs398123317	0.018	0.50676	D	0	0.92824	D	1	0.90584	D	0.999	0.92359	D	0	0.8433	D	0	1	0.81001	D	3.37	0.91327	M	-5.04	0.98594	D	-4.81	0.80767	D	0.981	0.991	1.062	0.98388	D	0.979	0.99346	D	9	0.99086	0.99599
chr10	87925558	87925561	GTAA	-	splicing	PTEN	.	.	.	rs398123318	.	.	.	.	.	.	.	.	.	.	.	.	.	.	.	.	.	.	.	.	.	.	.	.	.	.	.	.	.	.	.	.	.	.	.	.	.	.	.
chr10	87925558	87925558	G	C	splicing	PTEN	NM_000314:exon3:c.209+1G>C,NM_001304717:exon4:c.728+1G>C	.	.	.	.	.	.	.	.	.	.	.	.	.	.	.	.	.	.	.	1	0.81001	D	.	.	.	.	.	.	.	.	.	.	.	.	.	.	.	.	.	.	.	.
chr10	87931034	87931034	C	G	intronic	PTEN	.	.	.	.	.	.	.	.	.	.	.	.	.	.	.	.	.	.	.	.	.	.	.	.	.	.	.	.	.	.	.	.	.	.	.	.	.	.	.	.	.	.	.
chr10	87931090	87931090	G	A	splicing	PTEN	NM_001304718:exon3:UTR5,NM_000314:exon4:c.253+1G>A,NM_001304717:exon5:c.772+1G>A	.	.	rs587776667	.	.	.	.	.	.	.	.	.	.	.	.	.	.	.	.	1	0.81001	D	.	.	.	.	.	.	.	.	.	.	.	.	.	.	.	.	.	.	.	.
chr10	87931090	87931090	G	A	splicing	PTEN	NM_001304718:exon3:UTR5,NM_000314:exon4:c.253+1G>A,NM_001304717:exon5:c.772+1G>A	.	.	rs587776667	.	.	.	.	.	.	.	.	.	.	.	.	.	.	.	.	1	0.81001	D	.	.	.	.	.	.	.	.	.	.	.	.	.	.	.	.	.	.	.	.
chr10	87933043	87933043	C	T	exonic	PTEN	.	nonsynonymous SNV	PTEN:NM_000314:exon5:c.C284T:p.P95L,PTEN:NM_001304717:exon6:c.C803T:p.P268L	rs786204856	0.001	0.7849	D	0.003	0.76473	D	1	0.90584	D	0.999	0.92359	D	0	0.8433	D	0	1	0.81001	D	3.345	0.91022	M	-4.99	0.98507	D	-7.78	0.9587	D	0.894	0.89353	1.1	0.99645	D	0.965	0.98869	D	9	0.955326	0.94891
chr10	87933061	87933061	T	C	exonic	PTEN	.	nonsynonymous SNV	PTEN:NM_000314:exon5:c.T302C:p.I101T,PTEN:NM_001304717:exon6:c.T821C:p.I274T	rs1339631701	0.001	0.7849	D	0.002	0.79402	D	1	0.90584	D	0.998	0.88582	D	0	0.8433	D	0	1	0.81001	D	3.285	0.90273	M	-5.12	0.98731	D	-4.78	0.8051	D	0.982	0.99181	1.096	0.99481	D	0.969	0.9903	D	9	0.946577	0.93985
chr10	87933061	87933061	T	C	exonic	PTEN	.	nonsynonymous SNV	PTEN:NM_000314:exon5:c.T302C:p.I101T,PTEN:NM_001304717:exon6:c.T821C:p.I274T	rs1339631701	0.001	0.7849	D	0.002	0.79402	D	1	0.90584	D	0.998	0.88582	D	0	0.8433	D	0	1	0.81001	D	3.285	0.90273	M	-5.12	0.98731	D	-4.78	0.8051	D	0.982	0.99181	1.096	0.99481	D	0.969	0.9903	D	9	0.946577	0.93985
chr10	87933147	87933147	C	T	exonic	PTEN	.	stopgain	PTEN:NM_000314:exon5:c.C388T:p.R130X,PTEN:NM_001304717:exon6:c.C907T:p.R303X	rs121909224	.	.	.	.	.	.	.	.	.	.	.	.	0	0.8433	D	0	1	0.81001	A	.	.	.	.	.	.	.	.	.	0.967	0.9775	.	.	.	.	.	.	.	.	.
chr10	87933147	87933147	C	T	exonic	PTEN	.	stopgain	PTEN:NM_000314:exon5:c.C388T:p.R130X,PTEN:NM_001304717:exon6:c.C907T:p.R303X	rs121909224	.	.	.	.	.	.	.	.	.	.	.	.	0	0.8433	D	0	1	0.81001	A	.	.	.	.	.	.	.	.	.	0.967	0.9775	.	.	.	.	.	.	.	.	.
chr10	87933147	87933147	C	T	exonic	PTEN	.	stopgain	PTEN:NM_000314:exon5:c.C388T:p.R130X,PTEN:NM_001304717:exon6:c.C907T:p.R303X	rs121909224	.	.	.	.	.	.	.	.	.	.	.	.	0	0.8433	D	0	1	0.81001	A	.	.	.	.	.	.	.	.	.	0.967	0.9775	.	.	.	.	.	.	.	.	.
chr10	87933147	87933147	C	T	exonic	PTEN	.	stopgain	PTEN:NM_000314:exon5:c.C388T:p.R130X,PTEN:NM_001304717:exon6:c.C907T:p.R303X	rs121909224	.	.	.	.	.	.	.	.	.	.	.	.	0	0.8433	D	0	1	0.81001	A	.	.	.	.	.	.	.	.	.	0.967	0.9775	.	.	.	.	.	.	.	.	.
chr10	87933147	87933147	C	T	exonic	PTEN	.	stopgain	PTEN:NM_000314:exon5:c.C388T:p.R130X,PTEN:NM_001304717:exon6:c.C907T:p.R303X	rs121909224	.	.	.	.	.	.	.	.	.	.	.	.	0	0.8433	D	0	1	0.81001	A	.	.	.	.	.	.	.	.	.	0.967	0.9775	.	.	.	.	.	.	.	.	.
chr10	87933148	87933148	G	A	exonic	PTEN	.	nonsynonymous SNV	PTEN:NM_000314:exon5:c.G389A:p.R130Q,PTEN:NM_001304717:exon6:c.G908A:p.R303Q	rs121909229	0	0.91255	D	0	0.92824	D	1	0.90584	D	0.998	0.88582	D	0	0.8433	D	0	1	0.81001	A	3.615	0.93875	H	-4.88	0.98296	D	-3.86	0.72471	D	0.97	0.98065	1.062	0.98376	D	0.978	0.99322	D	8	0.994494	0.99946
chr10	87933164	87933164	A	G	exonic	PTEN	.	nonsynonymous SNV	PTEN:NM_000314:exon5:c.A405G:p.I135M,PTEN:NM_001304717:exon6:c.A924G:p.I308M	.	0.001	0.7849	D	0.002	0.79402	D	1	0.90584	D	0.999	0.92359	D	0	0.8433	D	0	1	0.81001	D	3.28	0.90206	M	-5.38	0.99045	D	-2.7	0.57599	D	0.92	0.92317	1.095	0.99448	D	0.974	0.99195	D	9	0.978254	0.97692
chr10	87933164	87933164	A	G	exonic	PTEN	.	nonsynonymous SNV	PTEN:NM_000314:exon5:c.A405G:p.I135M,PTEN:NM_001304717:exon6:c.A924G:p.I308M	.	0.001	0.7849	D	0.002	0.79402	D	1	0.90584	D	0.999	0.92359	D	0	0.8433	D	0	1	0.81001	D	3.28	0.90206	M	-5.38	0.99045	D	-2.7	0.57599	D	0.92	0.92317	1.095	0.99448	D	0.974	0.99195	D	9	0.978254	0.97692
chr10	87933165	87933165	T	C	exonic	PTEN	.	nonsynonymous SNV	PTEN:NM_000314:exon5:c.T406C:p.C136R,PTEN:NM_001304717:exon6:c.T925C:p.C309R	rs786201044	0.001	0.7849	D	0.002	0.79402	D	1	0.90584	D	0.999	0.92359	D	0	0.8433	D	0	1	0.81001	D	3.71	0.94693	H	-5.11	0.98715	D	-9.91	0.98746	D	0.978	0.9884	1.051	0.98137	D	0.98	0.99388	D	9	0.994512	0.99947
chr10	87933165	87933165	T	C	exonic	PTEN	.	nonsynonymous SNV	PTEN:NM_000314:exon5:c.T406C:p.C136R,PTEN:NM_001304717:exon6:c.T925C:p.C309R	rs786201044	0.001	0.7849	D	0.002	0.79402	D	1	0.90584	D	0.999	0.92359	D	0	0.8433	D	0	1	0.81001	D	3.71	0.94693	H	-5.11	0.98715	D	-9.91	0.98746	D	0.978	0.9884	1.051	0.98137	D	0.98	0.99388	D	9	0.994512	0.99947
chr10	87933222	87933222	T	C	exonic	PTEN	.	nonsynonymous SNV	PTEN:NM_000314:exon5:c.T463C:p.Y155H,PTEN:NM_001304717:exon6:c.T982C:p.Y328H	rs398123325	0	0.91255	D	0	0.92824	D	1	0.90584	D	0.999	0.92359	D	0	0.8433	D	0	1	0.81001	D	3.075	0.87202	M	-1.99	0.8532	D	-4.83	0.80943	D	0.965	0.97535	0.844	0.94959	D	0.807	0.93471	D	9	0.949847	0.94318
chr10	87933252	87933252	G	A	splicing	PTEN	NM_001304718:exon4:UTR5,NM_000314:exon5:c.492+1G>A,NM_001304717:exon6:c.1011+1G>A	.	.	.	.	.	.	.	.	.	.	.	.	.	.	.	.	.	.	.	1	0.81001	D	.	.	.	.	.	.	.	.	.	.	.	.	.	.	.	.	.	.	.	.
chr10	87933252	87933252	G	C	splicing	PTEN	NM_001304718:exon4:UTR5,NM_000314:exon5:c.492+1G>C,NM_001304717:exon6:c.1011+1G>C	.	.	.	.	.	.	.	.	.	.	.	.	.	.	.	.	.	.	.	1	0.81001	D	.	.	.	.	.	.	.	.	.	.	.	.	.	.	.	.	.	.	.	.
chr10	87952132	87952135	CAGT	-	exonic	PTEN	.	frameshift deletion	PTEN:NM_000314:exon6:c.507_510del:p.S170Rfs*12,PTEN:NM_001304717:exon7:c.1026_1029del:p.S343Rfs*12	.	.	.	.	.	.	.	.	.	.	.	.	.	.	.	.	.	.	.	.	.	.	.	.	.	.	.	.	.	.	.	.	.	.	.	.	.	.	.	.
chr10	87952136	87952136	C	T	exonic	PTEN	.	stopgain	PTEN:NM_000314:exon6:c.C511T:p.Q171X,PTEN:NM_001304717:exon7:c.C1030T:p.Q344X	rs786204864	.	.	.	.	.	.	.	.	.	.	.	.	7e-06	0.62929	D	0.114128	1	0.81001	A	.	.	.	.	.	.	.	.	.	0.958	0.96758	.	.	.	.	.	.	.	.	.
chr10	87952142	87952142	C	T	exonic	PTEN	.	nonsynonymous SNV	PTEN:NM_000314:exon6:c.C517T:p.R173C,PTEN:NM_001304717:exon7:c.C1036T:p.R346C	rs121913293	0	0.91255	D	0	0.92824	D	1	0.90584	D	0.966	0.71341	D	0	0.8433	D	0.04896	1	0.81001	D	4.035	0.9696	H	-5.24	0.98905	D	-7.16	0.9412	D	0.993	0.99863	1.058	0.98289	D	0.981	0.99421	D	9	0.974604	0.97178
chr10	87952142	87952142	C	T	exonic	PTEN	.	nonsynonymous SNV	PTEN:NM_000314:exon6:c.C517T:p.R173C,PTEN:NM_001304717:exon7:c.C1036T:p.R346C	rs121913293	0	0.91255	D	0	0.92824	D	1	0.90584	D	0.966	0.71341	D	0	0.8433	D	0.04896	1	0.81001	D	4.035	0.9696	H	-5.24	0.98905	D	-7.16	0.9412	D	0.993	0.99863	1.058	0.98289	D	0.981	0.99421	D	9	0.974604	0.97178
chr10	87952142	87952142	C	T	exonic	PTEN	.	nonsynonymous SNV	PTEN:NM_000314:exon6:c.C517T:p.R173C,PTEN:NM_001304717:exon7:c.C1036T:p.R346C	rs121913293	0	0.91255	D	0	0.92824	D	1	0.90584	D	0.966	0.71341	D	0	0.8433	D	0.04896	1	0.81001	D	4.035	0.9696	H	-5.24	0.98905	D	-7.16	0.9412	D	0.993	0.99863	1.058	0.98289	D	0.981	0.99421	D	9	0.974604	0.97178
chr10	87952170	87952170	-	A	exonic	PTEN	.	frameshift insertion	PTEN:NM_000314:exon6:c.546dupA:p.N184Efs*6,PTEN:NM_001304717:exon7:c.1065dupA:p.N357Efs*6	.	.	.	.	.	.	.	.	.	.	.	.	.	.	.	.	.	.	.	.	.	.	.	.	.	.	.	.	.	.	.	.	.	.	.	.	.	.	.	.
chr10	87952207	87952207	-	T	exonic	PTEN	.	frameshift insertion	PTEN:NM_000314:exon6:c.583dupT:p.H196Sfs*6,PTEN:NM_001304717:exon7:c.1102dupT:p.H369Sfs*6	rs876659456	.	.	.	.	.	.	.	.	.	.	.	.	.	.	.	.	.	.	.	.	.	.	.	.	.	.	.	.	.	.	.	.	.	.	.	.	.	.	.
chr10	87957855	87957855	C	-	exonic	PTEN	.	frameshift deletion	PTEN:NM_000314:exon7:c.637delC:p.P213Lfs*8,PTEN:NM_001304718:exon7:c.46delC:p.P16fs,PTEN:NM_001304717:exon8:c.1156delC:p.P386Lfs*8	.	.	.	.	.	.	.	.	.	.	.	.	.	.	.	.	.	.	.	.	.	.	.	.	.	.	.	.	.	.	.	.	.	.	.	.	.	.	.	.
chr10	87957858	87957858	C	T	exonic	PTEN	.	stopgain	PTEN:NM_000314:exon7:c.C640T:p.Q214X,PTEN:NM_001304718:exon7:c.C49T:p.Q17X,PTEN:NM_001304717:exon8:c.C1159T:p.Q387X	rs121909227	.	.	.	.	.	.	.	.	.	.	.	.	2.5e-05	0.55875	D	0.164422	1	0.81001	A	.	.	.	.	.	.	.	.	.	0.959	0.96871	.	.	.	.	.	.	.	.	.
chr10	87957955	87957955	C	T	exonic	PTEN	.	nonsynonymous SNV	PTEN:NM_000314:exon7:c.C737T:p.P246L,PTEN:NM_001304718:exon7:c.C146T:p.P49L,PTEN:NM_001304717:exon8:c.C1256T:p.P419L	rs587782350	0.014	0.53172	D	0.363	0.16815	T	0.728	0.42542	P	0.116	0.31939	B	2e-06	0.62929	D	0.103668	1	0.81001	D	2.135	0.59519	M	-2.06	0.85875	D	-5.84	0.88431	D	0.964	0.97426	0.024	0.82741	D	0.511	0.81657	D	9	0.87187	0.86457
chr10	87960892	87960892	A	-	splicing	PTEN	NM_001304718:exon8:c.211-2A>-,NM_000314:exon8:c.802-2A>-,NM_001304717:exon9:c.1321-2A>-	.	.	rs886047397	.	.	.	.	.	.	.	.	.	.	.	.	.	.	.	.	.	.	.	.	.	.	.	.	.	.	.	.	.	.	.	.	.	.	.	.	.	.	.
chr10	87960892	87960892	A	G	splicing	PTEN	NM_001304718:exon8:c.211-2A>G,NM_000314:exon8:c.802-2A>G,NM_001304717:exon9:c.1321-2A>G	.	.	rs587782455	.	.	.	.	.	.	.	.	.	.	.	.	.	.	.	.	1	0.81001	D	.	.	.	.	.	.	.	.	.	.	.	.	.	.	.	.	.	.	.	.
chr10	87961045	87961049	TTACT	-	exonic	PTEN	.	frameshift deletion	PTEN:NM_000314:exon8:c.953_957del:p.T319Nfs*4,PTEN:NM_001304718:exon8:c.362_366del:p.L121fs,PTEN:NM_001304717:exon9:c.1472_1476del:p.T492Nfs*4	.	.	.	.	.	.	.	.	.	.	.	.	.	.	.	.	.	.	.	.	.	.	.	.	.	.	.	.	.	.	.	.	.	.	.	.	.	.	.	.
chr10	87961048	87961051	CTTT	-	exonic	PTEN	.	frameshift deletion	PTEN:NM_000314:exon8:c.956_959del:p.T319Kfs*24,PTEN:NM_001304718:exon8:c.365_368del:p.T122fs,PTEN:NM_001304717:exon9:c.1475_1478del:p.T492Kfs*24;PTEN:NM_000314:exon8:c.956_959del:p.T319Kfs*24,PTEN:NM_001304718:exon8:c.365_368del:p.T122fs,PTEN:NM_001304717:exon9:c.1475_1478del:p.T492Kfs*24	rs398123330	.	.	.	.	.	.	.	.	.	.	.	.	.	.	.	.	.	.	.	.	.	.	.	.	.	.	.	.	.	.	.	.	.	.	.	.	.	.	.
chr10	87961048	87961051	CTTT	-	exonic	PTEN	.	frameshift deletion	PTEN:NM_000314:exon8:c.956_959del:p.T319Kfs*24,PTEN:NM_001304718:exon8:c.365_368del:p.T122fs,PTEN:NM_001304717:exon9:c.1475_1478del:p.T492Kfs*24;PTEN:NM_000314:exon8:c.956_959del:p.T319Kfs*24,PTEN:NM_001304718:exon8:c.365_368del:p.T122fs,PTEN:NM_001304717:exon9:c.1475_1478del:p.T492Kfs*24	rs398123330	.	.	.	.	.	.	.	.	.	.	.	.	.	.	.	.	.	.	.	.	.	.	.	.	.	.	.	.	.	.	.	.	.	.	.	.	.	.	.
chr10	87961049	87961049	T	-	exonic	PTEN	.	stopgain	PTEN:NM_000314:exon8:c.957delT:p.L320*,PTEN:NM_001304718:exon8:c.366delT:p.T122fs,PTEN:NM_001304717:exon9:c.1476delT:p.L493*	rs1114167682	.	.	.	.	.	.	.	.	.	.	.	.	.	.	.	.	.	.	.	.	.	.	.	.	.	.	.	.	.	.	.	.	.	.	.	.	.	.	.
chr10	87961068	87961068	G	A	exonic	PTEN	.	nonsynonymous SNV	PTEN:NM_000314:exon8:c.G976A:p.D326N,PTEN:NM_001304718:exon8:c.G385A:p.D129N,PTEN:NM_001304717:exon9:c.G1495A:p.D499N	.	0	0.91255	D	0	0.92824	D	1	0.90584	D	0.999	0.92359	D	0	0.8433	D	0	1	0.81001	D	3.28	0.90206	M	-4.41	0.97444	D	-4.62	0.79143	D	0.939	0.9455	1.087	0.99108	D	0.954	0.98517	D	9	0.926156	0.91963
chr10	87961095	87961095	C	T	exonic	PTEN	.	stopgain	PTEN:NM_000314:exon8:c.C1003T:p.R335X,PTEN:NM_001304718:exon8:c.C412T:p.R138X,PTEN:NM_001304717:exon9:c.C1522T:p.R508X	rs121909231	.	.	.	.	.	.	.	.	.	.	.	.	2e-06	0.62929	D	0.053988	1	0.81001	A	.	.	.	.	.	.	.	.	.	0.914	0.91621	.	.	.	.	.	.	.	.	.
chr10	87961095	87961095	C	T	exonic	PTEN	.	stopgain	PTEN:NM_000314:exon8:c.C1003T:p.R335X,PTEN:NM_001304718:exon8:c.C412T:p.R138X,PTEN:NM_001304717:exon9:c.C1522T:p.R508X	rs121909231	.	.	.	.	.	.	.	.	.	.	.	.	2e-06	0.62929	D	0.053988	1	0.81001	A	.	.	.	.	.	.	.	.	.	0.914	0.91621	.	.	.	.	.	.	.	.	.
chr10	87961095	87961095	C	T	exonic	PTEN	.	stopgain	PTEN:NM_000314:exon8:c.C1003T:p.R335X,PTEN:NM_001304718:exon8:c.C412T:p.R138X,PTEN:NM_001304717:exon9:c.C1522T:p.R508X	rs121909231	.	.	.	.	.	.	.	.	.	.	.	.	2e-06	0.62929	D	0.053988	1	0.81001	A	.	.	.	.	.	.	.	.	.	0.914	0.91621	.	.	.	.	.	.	.	.	.
chr10	87961095	87961095	C	T	exonic	PTEN	.	stopgain	PTEN:NM_000314:exon8:c.C1003T:p.R335X,PTEN:NM_001304718:exon8:c.C412T:p.R138X,PTEN:NM_001304717:exon9:c.C1522T:p.R508X	rs121909231	.	.	.	.	.	.	.	.	.	.	.	.	2e-06	0.62929	D	0.053988	1	0.81001	A	.	.	.	.	.	.	.	.	.	0.914	0.91621	.	.	.	.	.	.	.	.	.
chr10	87961095	87961095	C	T	exonic	PTEN	.	stopgain	PTEN:NM_000314:exon8:c.C1003T:p.R335X,PTEN:NM_001304718:exon8:c.C412T:p.R138X,PTEN:NM_001304717:exon9:c.C1522T:p.R508X	rs121909231	.	.	.	.	.	.	.	.	.	.	.	.	2e-06	0.62929	D	0.053988	1	0.81001	A	.	.	.	.	.	.	.	.	.	0.914	0.91621	.	.	.	.	.	.	.	.	.
chr10	87961101	87961101	T	-	exonic	PTEN	.	frameshift deletion	PTEN:NM_000314:exon8:c.1009delT:p.S338Lfs*6,PTEN:NM_001304718:exon8:c.418delT:p.F140fs,PTEN:NM_001304717:exon9:c.1528delT:p.S511Lfs*6	.	.	.	.	.	.	.	.	.	.	.	.	.	.	.	.	.	.	.	.	.	.	.	.	.	.	.	.	.	.	.	.	.	.	.	.	.	.	.	.
chr10	87963435	87963435	A	G	intronic	PTEN	.	.	.	rs1194768011	.	.	.	.	.	.	.	.	.	.	.	.	.	.	.	.	.	.	.	.	.	.	.	.	.	.	.	.	.	.	.	.	.	.	.	.	.	.	.
chr10	87963435	87963435	A	G	intronic	PTEN	.	.	.	rs1194768011	.	.	.	.	.	.	.	.	.	.	.	.	.	.	.	.	.	.	.	.	.	.	.	.	.	.	.	.	.	.	.	.	.	.	.	.	.	.	.
chr10	87965285	87965285	A	G	splicing	PTEN	NM_001304718:exon9:c.436-2A>G,NM_000314:exon9:c.1027-2A>G,NM_001304717:exon10:c.1546-2A>G	.	.	rs1085308041	.	.	.	.	.	.	.	.	.	.	.	.	.	.	.	.	1	0.81001	D	.	.	.	.	.	.	.	.	.	.	.	.	.	.	.	.	.	.	.	.
[truncated: 119 more columns]
